# Supplementary material for: Epithelial cell–specific loss of function of Miz1 causes a spontaneous COPD-like phenotype and up-regulates Ace2 expression in mice
Source: PubMed Central journal article supplement — Sci Adv. 2020 Aug 14;6(33):eabb7238. doi: 10.1126/sciadv.abb7238 (PMC7428331; doi:10.1126/sciadv.abb7238), 2020-08-14
Supplement: abb7238_SM.pdf [file abb7238_SM.pdf]

## Supplementary Materials for

### **Epithelial cell-specific loss of function of *Miz1* causes a spontaneous COPD-like phenotype and up-regulates *Ace2* expression in mice**

Hanh Chi Do-Umehara, Cong Chen, Qiao Zhang, Alexander V. Misharin, Hiam Abdala-Valencia, S. Marina Casalino-Matsuda, Paul A. Reyfman, Kishore R. Anekalla, Francisco J. Gonzalez-Gonzalez, Marc A. Sala, Chao Peng, Ping Wu, Catherine C. L. Wong, Ravi Kalhan, Ankit Bharat, Harris Perlman, Karen M. Ridge, Jacob I. Sznajder, Peter H. S. Sporn, Navdeep S. Chandel, Jindan Yu, Xiangdong Fu, Irina Petrache, Rubin Tudor, G. R. Scott Budinger\*, Jing Liu\*

\*Corresponding author. Email: [jinglius@uic.edu](mailto:jinglius@uic.edu) (J.L.); [s-buding@northwestern.edu](mailto:s-buding@northwestern.edu) (G.R.S.B.)

Published 14 August 2020, *Sci. Adv.* **6**, eabb7238 (2020)

DOI: 10.1126/sciadv.abb7238

#### **This PDF file includes:**

Figs. S1 to S6  
Table S1

## Supplementary Figures

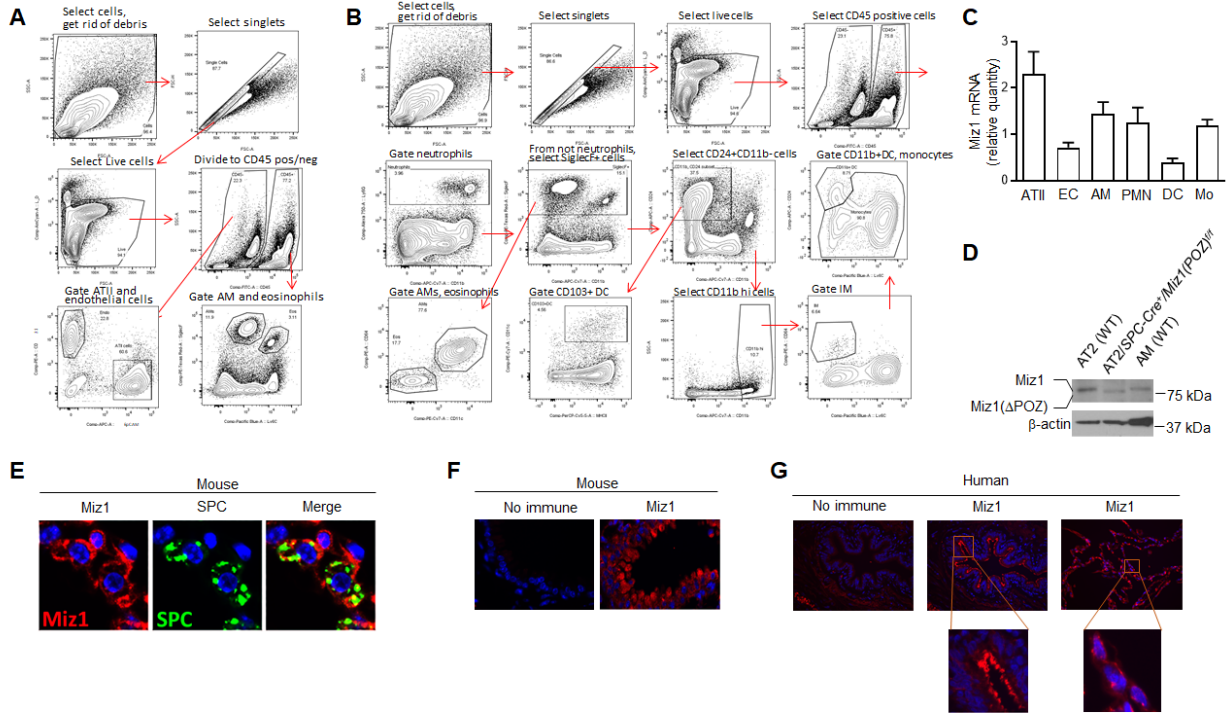

**Supplementary Fig. 1 Miz1 is ubiquitously expressed in most cell types in the lung. (A,B)** Gating strategies for flow-sorted cell types from the mouse lung. **(C)** Miz1 mRNA levels in AT2, endothelial cells (EC), AMs (AM), neutrophils (PMN), DCs (DC), and monocytes (Mo) isolated from wild-type mouse lungs. Data were presented as mean with SEM from 2 wild-type mice with technical triplets. **(D)** Miz1 protein expression in AT2 cells or AMs (AM) isolated from control *Miz1(POZ)<sup>fl/fl</sup>* or homozygous *SPC-Cre<sup>+</sup>/Miz1(POZ)<sup>fl/fl</sup>* mice as indicated. AT2 cells from *SPC-Cre<sup>+</sup>/Miz1(POZ)<sup>fl/fl</sup>* mice express a truncated Miz1 protein ~ 76 kDa as compared to the full-length 87 kDa Miz1 protein. **(E)** IF staining of Miz1 and SPC in wild-type mouse lungs. **(F)** IF staining of Miz1 in the airways of wild-type mouse lungs. **(G)** IF staining of Miz1 in normal human lungs. Left, no immune control; Middle, airways; Right, alveoli. Data are representative of at least two independent experiments.

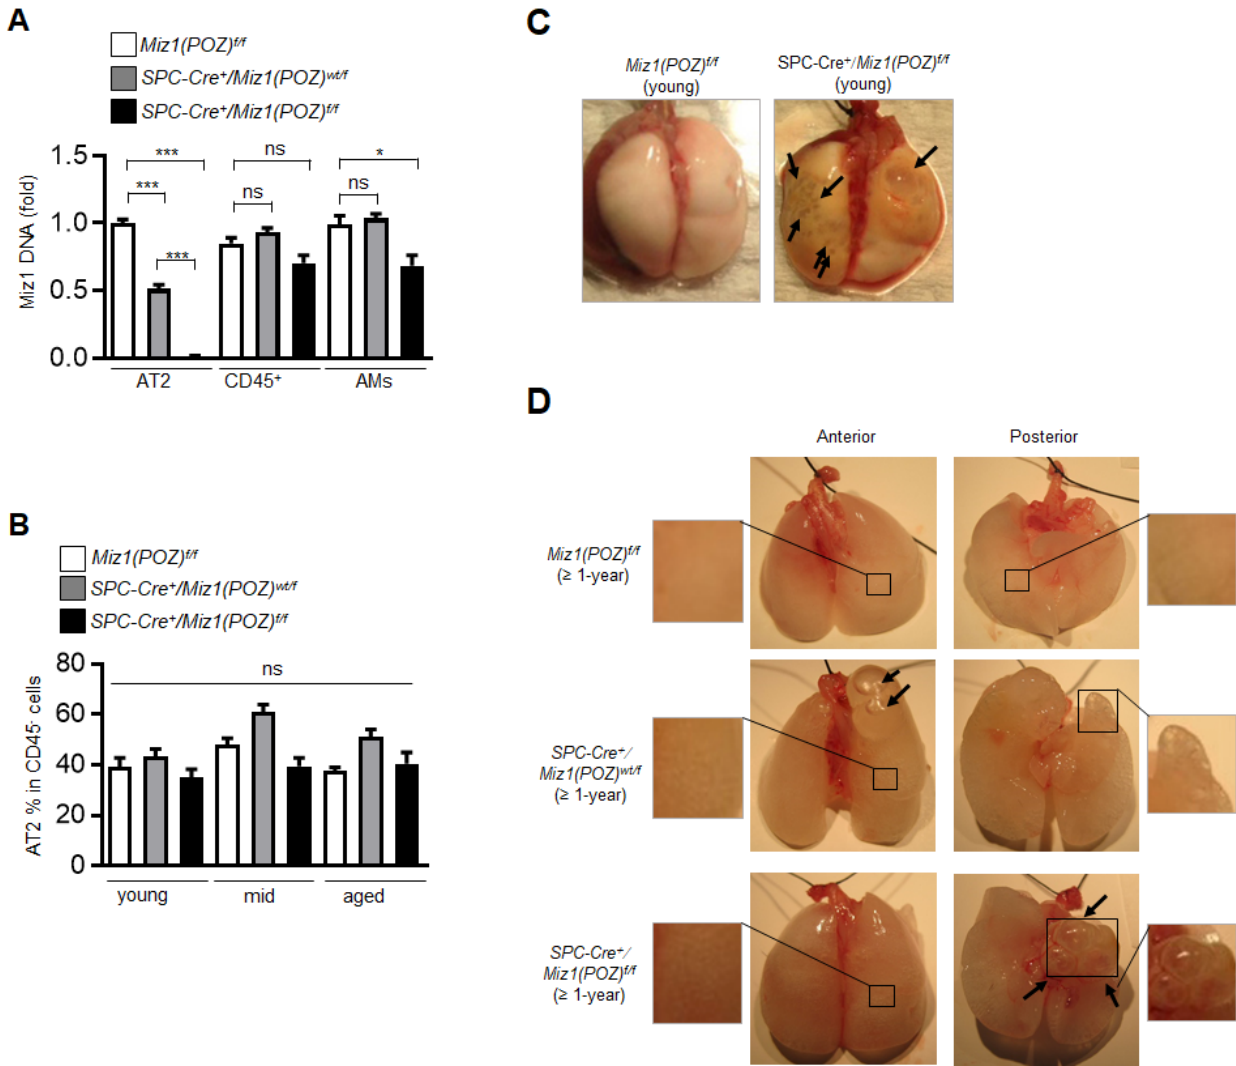

**Supplementary Fig. 2 The Miz1 POZ domain is specifically deleted in lung epithelial cells of *SPC-Cre<sup>+</sup>/Miz1(POZ)<sup>fl/fl</sup>* mice and loss of function of Miz1 does not affect lung epithelial cell proliferation.** (A) qPCR of the Miz1 POZ domain using genomic DNA in AT2, AMs, or other CD45<sup>+</sup> cells (after gating out AMs) isolated from control *Miz1(POZ)<sup>fl/fl</sup>*, or heterozygous *SPC-Cre<sup>+</sup>/Miz1(POZ)<sup>wt/fl</sup>*, or homozygous *SPC-Cre<sup>+</sup>/Miz1(POZ)<sup>fl/fl</sup>* mice ( $n = 3-4$ ). ns, non-significant; \*,  $p < 0.05$ ; \*\*\*,  $p < 0.001$ . (B) AT2 cell percentage in CD45-negative cells of young (~ 2-month-old), middle-aged (~ 6-month-old), or aged ( $\geq 1$ -year-old) control *Miz1(POZ)<sup>fl/fl</sup>*, or heterozygous *SPC-Cre<sup>+</sup>/Miz1(POZ)<sup>wt/fl</sup>*, or homozygous *SPC-Cre<sup>+</sup>/Miz1(POZ)<sup>fl/fl</sup>* mice.  $n = 3-6$ . (C,D) Gross photograph of the lung from  $\leq 4$ -month-old control *Miz1(POZ)<sup>fl/fl</sup>* or homozygous *SPC-Cre<sup>+</sup>/Miz1(POZ)<sup>fl/fl</sup>* mice (C), or  $\geq 1$ -year-old control *Miz1(POZ)<sup>fl/fl</sup>*, or heterozygous *SPC-Cre<sup>+</sup>/Miz1(POZ)<sup>wt/fl</sup>*, or homozygous *SPC-Cre<sup>+</sup>/Miz1(POZ)<sup>fl/fl</sup>* mice (D). Arrows indicate bullous emphysema-like changes. Data are representative of at least three independent experiments. Photo credits: Hanh Chi Do-Umehara (C,D).

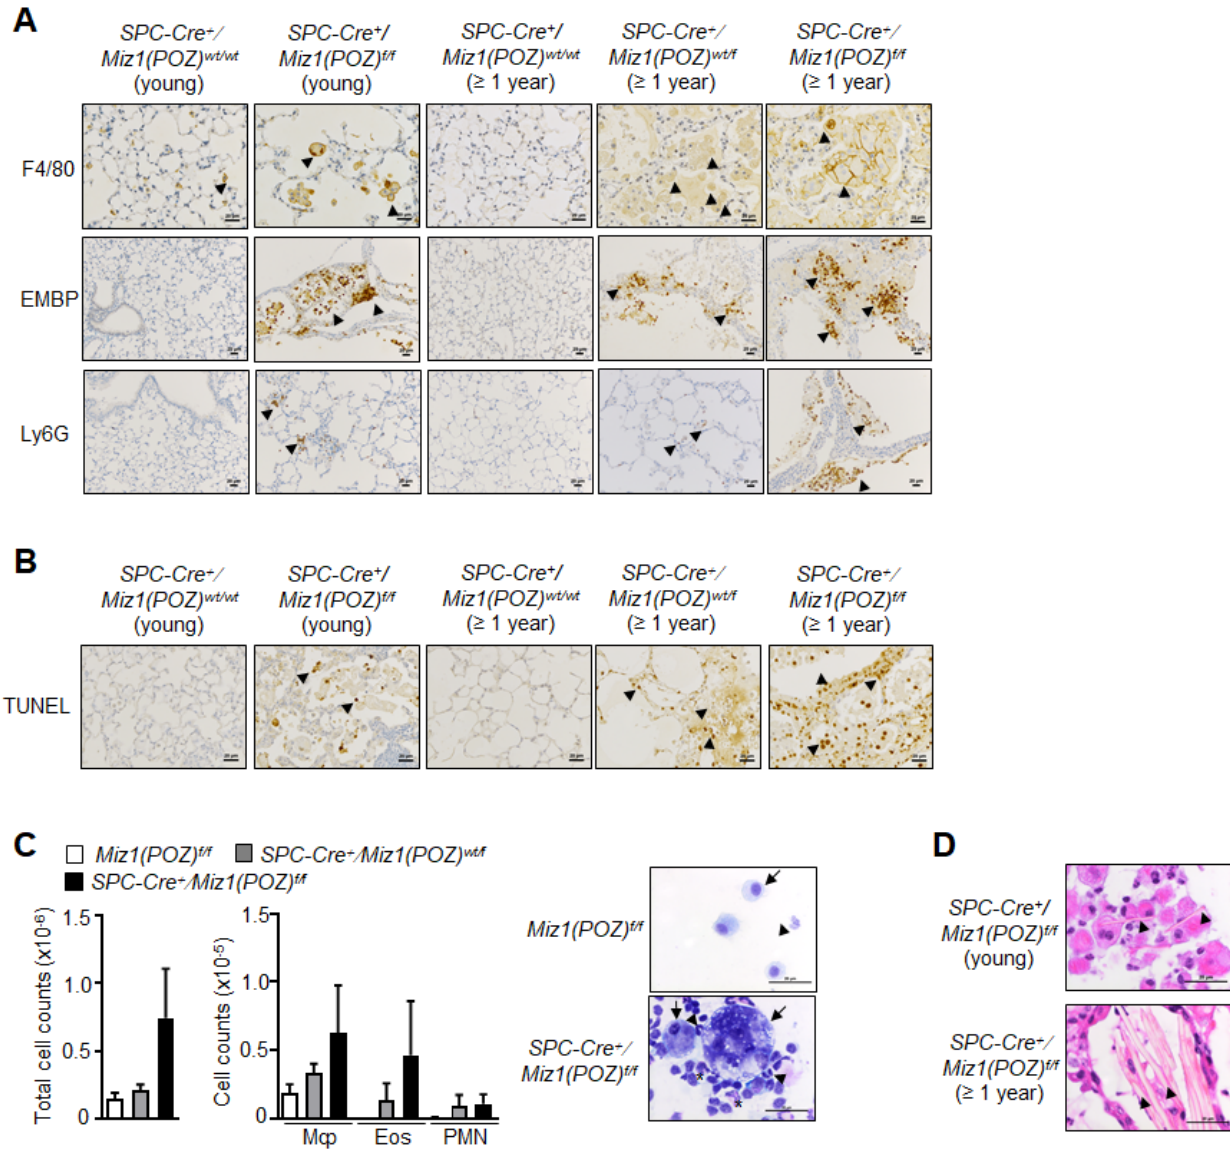

**Supplementary Fig. 3 Mice with lung epithelial loss of function of Miz1 have inflammatory cell infiltrates and increased apoptosis in the lung.** (A) Representative IHC staining of F4/80 (macrophages) ( $\times 40$  objective), EMBP (eosinophils) ( $\times 20$  objective), or Ly6G (PMNs) ( $\times 20$  objective) of lungs from young control *SPC-Cre<sup>+</sup>/Miz1(POZ)<sup>wt/wt</sup>*, or homozygous *SPC-Cre<sup>+</sup>/Miz1(POZ)<sup>fl/fl</sup>* mice, or  $\geq 1$ -year-old control *SPC-Cre<sup>+</sup>/Miz1(POZ)<sup>wt/wt</sup>*, or heterozygous *SPC-Cre<sup>+</sup>/Miz1(POZ)<sup>wt/fl</sup>*, or homozygous *SPC-Cre<sup>+</sup>/Miz1(POZ)<sup>fl/fl</sup>* mice. (B) Representative TUNEL ( $\times 40$  objective) staining of lungs from mice in (A). (C) BALF total cell counts (left), or BALF cell differentials (middle) from  $\geq 1$ -year-old control *Miz1(POZ)<sup>fl/fl</sup>*, or heterozygous *SPC-Cre<sup>+</sup>/Miz1(POZ)<sup>wt/fl</sup>*, or homozygous *SPC-Cre<sup>+</sup>/Miz1(POZ)<sup>fl/fl</sup>* mice ( $n = 4-6$ ). Note, macrophages (Mq), eosinophils (Eos), and neutrophils (PMN). Right, representative picture of recovered BALF cells stained with Wright-Giemsa. Macrophages, neutrophils, and eosinophils were shown by arrows, arrow heads, and stars, respectively. Giant, multinucleated, and vacuolated macrophages were clearly evident. (D) Representative histological sections ( $\times 100$  objective) of lungs showing

the presence of eosinophilic crystals (shown as arrow heads) in young or aged *SPC-Cre<sup>+</sup>/Miz1(POZ)<sup>fl/fl</sup>* mice. Data are representative of at least three independent experiments.

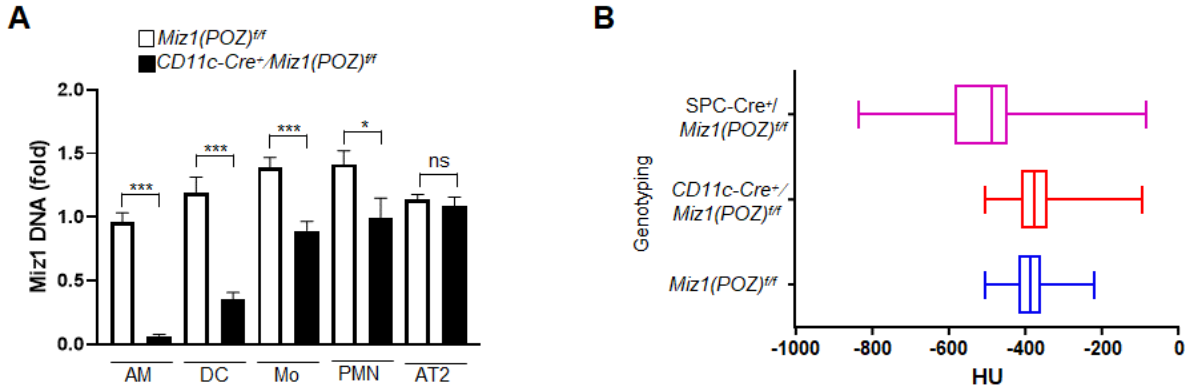

**Supplementary Fig. 4 Deletion of the Miz1 POZ domain in different cell types of the lung from *CD11c-Cre<sup>+</sup>/Miz1(POZ)<sup>fl/fl</sup>* mice and normal lung radiographic density in aged *CD11c-Cre<sup>+</sup>/Miz1(POZ)<sup>fl/fl</sup>* mice.** (A) qPCR of the Miz1 POZ domain using genomic DNA of AMs (AM), DCs (DC), monocytes (Mo), neutrophils (PMN), or AT2 cells isolated from control *Miz1(POZ)<sup>fl/fl</sup>* or *CD11c-Cre<sup>+</sup>/Miz1(POZ)<sup>fl/fl</sup>* mice ( $n = 4-5$ ). Data are representative of at least three independent experiments. (B) Representative Hounsfield units (HU) of the lung parenchyma from  $\geq 1$ -year-old control *Miz1(POZ)<sup>fl/fl</sup>* or homozygous *SPC-Cre<sup>+</sup>/Miz1(POZ)<sup>fl/fl</sup>* or *CD11c-Cre<sup>+</sup>/Miz1(POZ)<sup>fl/fl</sup>* mouse.

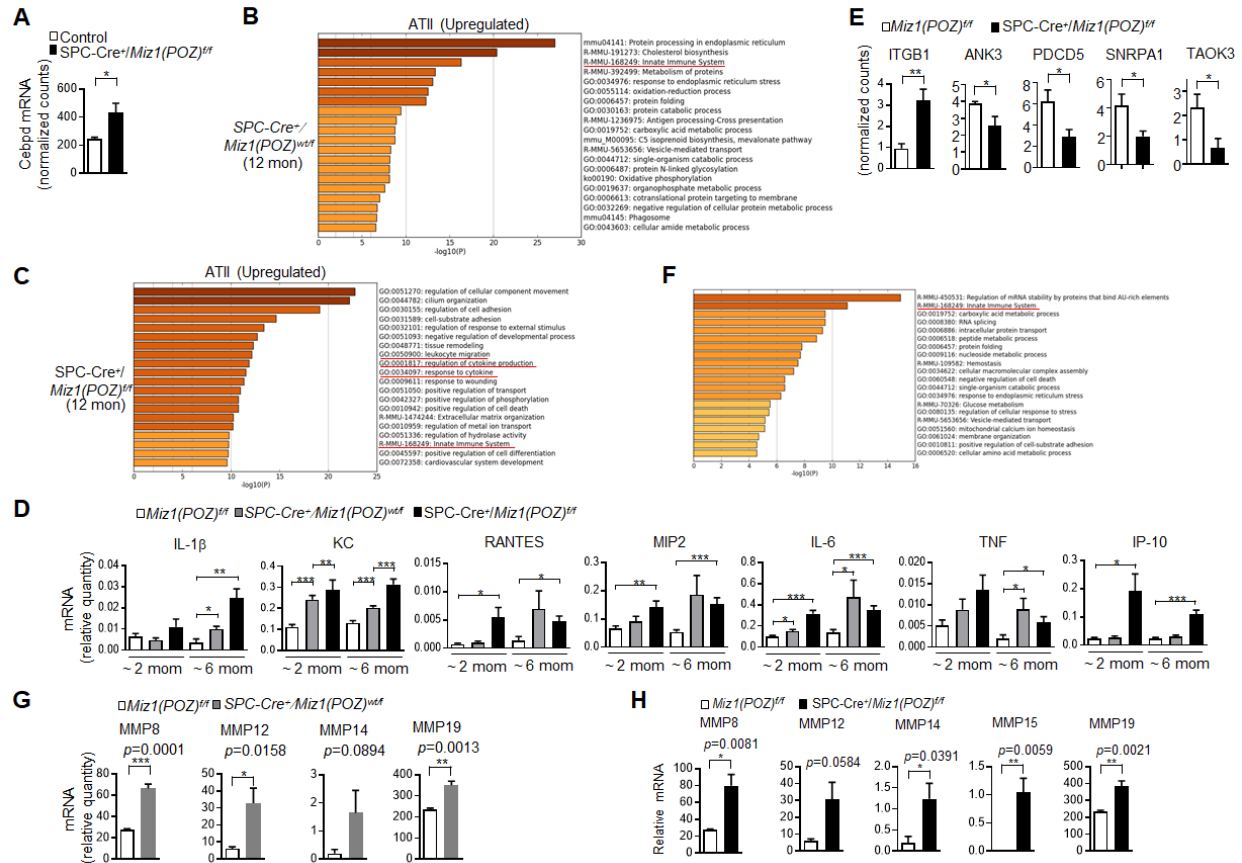

**Supplementary Fig. 5 Deletion of the Miz1 POZ domain results in deregulated expression of inflammatory genes and candidate genes involved in COPD.** (A) Cebpd mRNA levels analyzed by RNA-seq in AT2 cells from 6-month-old control *Miz1(POZ)<sup>fl/fl</sup>* and homozygous *SPC-Cre<sup>+</sup>/Miz1(POZ)<sup>fl/fl</sup>* mice ( $n = 4$ ). (B,C) GO analysis of differentially expressed genes (analyzed by RNA-seq) in AT2 cells from 1-year-old control *Miz1(POZ)<sup>fl/fl</sup>*, or heterozygous *SPC-Cre<sup>+</sup>/Miz1(POZ)<sup>wt/fl</sup>* (B) or homozygous *SPC-Cre<sup>+</sup>/Miz1(POZ)<sup>fl/fl</sup>* mice (C).  $n \geq 4$ . (D) mRNA levels (analyzed by RT-qPCR) of inflammatory genes, including IL-1 $\beta$ , KC, RANTES, MIP2, IL-6, TNF, and IP-10, in primary AT2 cell isolated from control *Miz1(POZ)<sup>fl/fl</sup>*, or heterozygous *SPC-Cre<sup>+</sup>/Miz1(POZ)<sup>wt/fl</sup>*, or homozygous *SPC-Cre<sup>+</sup>/Miz1(POZ)<sup>fl/fl</sup>* mice at ~2 or 6 months of age ( $n = 4-6$ ). (E,F) Protein abundance of ITGB1, ANK3, PDCD5, SNRPA1, and TAOK3 (analyzed by proteomics) (E), or GO analysis of differentially expressed proteins (analyzed by proteomics) (F) in AT2 cells isolated from young ( $\leq 4$ -month-old) control *Miz1(POZ)<sup>fl/fl</sup>* ( $n = 3$ ) or homozygous *SPC-Cre<sup>+</sup>/Miz1(POZ)<sup>fl/fl</sup>* mice ( $n = 3$ ). (G,H) mRNA levels (analyzed by RNA-seq) of various MMPs in AMs from 6-month-old control *Miz1(POZ)<sup>fl/fl</sup>* or heterozygous *SPC-Cre<sup>+</sup>/Miz1(POZ)<sup>wt/fl</sup>* (G), or homozygous *SPC-Cre<sup>+</sup>/Miz1(POZ)<sup>fl/fl</sup>* mice (H) ( $n = 3-4$ ). Red underlines indicate pathways involved in innate immunity.



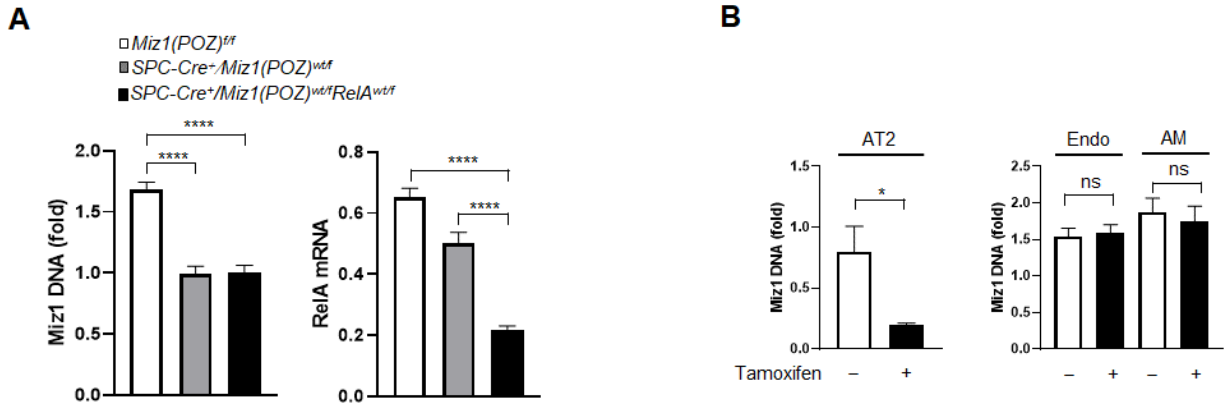

**Supplementary Fig. 6 Characterization of the *SPC-Cre<sup>+</sup>/Miz1(POZ)<sup>wt/fl</sup>/RelA<sup>wt/fl</sup>* mice and tamoxifen-treated *SPC-CreER<sup>T2</sup>+ /Miz1(POZ)<sup>fl/fl</sup>* mice.** (A) qPCR of the Miz1 POZ domain using genomic DNA (left;  $n = 3-6$ ) and RelA mRNA levels (right;  $n = 3-4$ ) in AT2 cells of  $\geq 1$ -year-old control *Miz1(POZ)<sup>fl/fl</sup>* or heterozygous *SPC-Cre<sup>+</sup>/Miz1(POZ)<sup>wt/fl</sup>* or *SPC-Cre<sup>+</sup>/Miz1(POZ)<sup>wt/fl</sup>RelA<sup>wt/fl</sup>* mice. (B) qPCR of the Miz1 POZ domain using genomic DNA in AT2, AMs, or endothelial cells (Endo) of tamoxifen-treated control *SPC-CreER<sup>T2</sup>-/Miz1(POZ)<sup>fl/fl</sup>* or *SPC-CreER<sup>T2</sup>+ /Miz1(POZ)<sup>fl/fl</sup>* mice.  $n = 2$ . Data are representative of at least three independent experiments.



**Supplementary Table 1. Primer sequences used for qPCR.**

| <b>Gene</b>     | <b>primer name</b>  | <b>Sequence</b>        |
|-----------------|---------------------|------------------------|
| Miz1 POZ domain | Primer 3            | CGTTGACTTCAAGGCTCACA   |
|                 | Primer 4            | GTCCACGTTCTCAGGGCTAA   |
| IL-1 $\beta$    | mIL-1 $\beta$ -1-5' | GCCCATCCTCTGTGACTCAT   |
|                 | mIL-1 $\beta$ -1-3' | AGGCCACAGGTATTTTGTCTG  |
| KC              | KC-1-5'             | ACTGCACCCAAACCGAAGTC   |
|                 | KC-1-3'             | TGGGGACACCTTTTAGCATCTT |
| RANTES          | RANTES-1-5'         | CCCTCACCATCATCCTCACT   |
|                 | RANTES-1-3'         | CCTTCGAGTGACAAACACGA   |
| MIP2            | MIP2-3-5'           | CAAGGGCGGTCAAAAAGTT    |
|                 | MIP2-3-3'           | AGGCACATCAGGTACGATCC   |
| IL-6            | mIL-6-1-5'          | AGTTGCCTTCTTGGGACTGA   |
|                 | mIL-6-1-3'          | TCCACGATTTCCCAGAGAAC   |
| TNF             | mTNF $\alpha$ -2-5' | GAACTGGCAGAAGAGGCACT   |
|                 | mTNF $\alpha$ -2-3' | AGGGTCTGGGCCATAGAACT   |
| IP10            | IP10-1-5'           | CCCACGTGTTGAGATCATTG   |
|                 | IP10-1-3'           | GAGGCTCTCTGCTGTCCATC   |
